## Genome analysis

# snpAD: An ancient DNA genotype caller.

Kay Prüfer<sup>1</sup>

<sup>1</sup>Max Planck Institute for Evolutionary Anthropology, 04103 Leipzig, Germany

Associate Editor: XXXXXXXX

Received on XXXXX; revised on XXXXX; accepted on XXXXX

### Abstract

**Motivation:** The study of ancient genomes can elucidate the evolutionary past. However, analyses are complicated by base-modifications in ancient DNA molecules that result in errors in DNA sequences. These errors are particularly common near the ends of sequences and pose a challenge for genotype calling.

**Results:** I describe an expectation-maximization algorithm that estimates genotype frequencies and errors along sequences to allow for accurate genotype calling from ancient sequences. The implementation of this method, called snpAD, performs well on high-coverage ancient data, as shown by simulations and by subsampling the data of a high-coverage Neandertal genome. Although estimates for low-coverage genomes are less accurate, I am able to derive approximate estimates of heterozygosity from several low-coverage Neandertals. These estimates show that low heterozygosity, compared to modern humans, was common among Neandertals.

**Availability:** The C++ code of snpAD is freely available at <http://bioinf.eva.mpg.de/snpAD/>

**Contact:** [pruefer@eva.mpg.de](mailto:pruefer@eva.mpg.de)

**Supplementary information:** Supplementary data are available at *Bioinformatics* online.

## 1 Introduction

Ancient DNA has been used to study the genomes of modern and archaic humans, mammals and plants, and has led to insights into the evolutionary past (Sarkissian *et al.*, 2015). Often, the analyses are based on sparse data. However, in some instances enough DNA molecules are preserved in ancient samples to allow for sequencing to deep coverage. This was, for instance, the case for several modern human remains (Slatkin and Racimo, 2016) and for two Neandertals and a Denisovan, extinct sister groups to present-day humans, for which genomes of at least 30-fold coverage could be generated (Meyer *et al.*, 2012; Prüfer *et al.*, 2014, 2017).

The analysis of ancient DNA is complicated by cytosine deamination, a common type of miscoding lesion accumulating in ancient DNA with increasing age and temperature (Sawyer *et al.*, 2012; Frederico *et al.*, 1990). These lesions are more frequent at the ends of ancient DNA fragments and cause cytosines to be misread as thymines (Briggs *et al.*, 2007). Laboratory methods exist that can remove this type of damage during library preparation (Briggs *et al.*, 2010). However, these methods also reduce the number of molecules that are made accessible to sequencing and are therefore best avoided when material is scarce and a high coverage genome is the aim.

The calling of diploid genotypes provides a computational means to reduce the impact of ancient DNA damage and several approaches have been published that take the characteristics of ancient DNA damage into account while calling genotypes (Lindgreen *et al.*, 2014; Link *et al.*, 2017; Zhou *et al.*, 2017; Prüfer *et al.*, 2017). These approaches have fixed error rates or estimate error rates by noting differences in sequences at conserved sites or by comparing sequences to a closely related genome. The error rates are then used for quality score recalibration or directly to estimate genotype frequencies for calling genotypes.

Here, I present a different approach that jointly estimates error rates and genotype frequencies from high-coverage ancient data. Using both simulated and real ancient DNA data I demonstrate that the method is effective in dealing with high error rates in ancient DNA.

## 2 Methods

### 2.1 Implementation

SnpAD implements an expectation-maximization algorithm that jointly estimates the frequency of sequencing errors and the frequency of genotypes. The algorithm proceeds by first estimating by maximum likelihood the frequency of genotypes given equal error rates for all base exchanges. These estimates are then used in a second step to re-estimate the error rates by comparing all sequences to a temporary genotype call.

The two steps are iterated until the likelihood for the first step does not increase significantly. The resulting error rates and genotype frequencies can then be used to infer the most likely genotype at each position.

### 2.1.1 Error model

The error model in snpAD assumes that the bases in the ancient sequences fall in classes that are known *a priori*, and that each class is characterized by a base substitution matrix that records the probabilities for all possible combinations of true and observed bases. In its current implementation, each base is classified by its position in the sequenced DNA fragments and optionally according to the type of sequencing library. However, the algorithm is independent of the classification scheme and further features of the data can be incorporated in the future.

I note that this model does not differentiate between sequencing error and ancient DNA damage, and that the probabilities given by the base quality scores are not taken into account. This choice is motivated by the fact that most ancient DNA fragments yield, due to their short length, overlapping mate pair sequences that can be merged after sequencing. The merged sequences show rarely low quality bases, indicated by a low quality score, thus rendering quality scores largely uninformative (Prüfer *et al.*, 2017).

From here on, I will refer to the probability of observing base  $b$  when the true base is  $B$  as  $P(b|B)$ . This probability is dependent on the strandedness of the sequence in which  $b$  resides and the position in this sequence. However, for ease of notation these details are omitted.

### 2.1.2 Estimating the frequency of genotypes

SnpAD estimates from the data the frequency of all 10 possible diploid genotypes, denoted  $P(AA), P(AC), \dots, P(TT)$ , assuming that the probabilities for errors are known and assuming independence between sites. Genotype frequencies differ substantially: the overwhelming majority of sites are generally homozygous for one of the four bases and few sites are heterozygous. I make use of this difference by estimating the frequency of homozygous genotypes from the base composition of the data.

To estimate base composition, snpAD determines at each position the base that most likely gave rise to the observed bases given the error model. With  $b_1, \dots, b_n$  bases in  $n$  sequences covering a site, the probability that the true base at this site is  $B$  is given by

$$\frac{1}{n} \sum_{i=1}^n P(b_i|B).$$

The base composition of the data,  $P(A), P(C), P(G), P(T)$ , is given by the frequencies of the bases with the highest probability at each site. With the frequency of heterozygous sites  $P_{het} = P(AC) + P(AG) + P(AT) + P(CG) + P(CT) + P(GT)$ , the frequency of homozygous genotypes can be estimated using the equation

$$P(BB) = (1 - P_{het})P(B). \quad (1)$$

The frequency of heterozygous genotypes in the data are estimated by maximum likelihood following approaches described previously (Nielsen *et al.*, 2011). Using the same notation as before, the software calculates the probability for observing  $n$  bases  $\beta = b_1, \dots, b_n$  when the true genotype is  $B_1B_2$  as

$$P(\beta|B_1B_2) = \prod_{i=1}^n \frac{P(b_i|B_1) + P(b_i|B_2)}{2}. \quad (2)$$

Assuming independence between sites, and considering all possible genotypes  $GT = \{AA, AC, AG, AT, CC, CG, CT, GG, GT, TT\}$ ,

the likelihood function is

$$\mathcal{L}(\theta|D) = P(D|\theta) = \prod_{\beta \in D} \sum_{g \in GT} P(\beta|g)P(g),$$

where  $D$  denotes the set of all sites and  $\theta$  denotes the error rates and the genotype frequencies. The likelihood is maximized using the BOBYQA algorithm (Powell, 2009) as implemented in the library *nlopt* (Johnson, 2014) with the six heterozygous genotypes as free parameters and homozygous genotypes calculated as detailed in equation (1).

### 2.1.3 Reference bias

Both experimental and computational procedures may introduce a bias in the observed data due to the short length of ancient DNA fragments. Methods that select DNA fragments by hybridization to a DNA probe may preferentially capture DNA molecules that are identical to the probe sequence. On the other hand, since only a limited number of mismatching bases are allowed in sequence alignment, and ancient DNA sequences contain a larger proportion of mismatches due to miscoding lesions, aligning sequences may be biased towards matching the reference sequence (Prüfer *et al.*, 2010). Note that modern human contamination in archaic human genomes also contributes to an overrepresentation of reference alleles.

SnpAD offers an option to take reference bias into account when estimating genotype probabilities and when producing genotype calls. For this, a new parameter  $r$  (with  $0.5 \leq r \leq 1$ ) is introduced to represent the frequency at which sequences are sampled from the reference allele as opposed to the alternative alleles at heterozygous sites. For genotypes with a reference base  $B_1$  and an alternative  $B_2$  equation (2) changes to

$$P(\beta|B_1B_2) = \prod_{i=1}^n rP(b_i|B_1) + (1-r)P(b_i|B_2),$$

and  $r$  is treated as an additional free parameter during the optimization step.

### 2.1.4 Genotype calling

With the frequencies of genotypes as priors, the posterior probability for each genotype  $G$  at a site  $\beta$  can be calculated as

$$P(G|\beta) = \frac{P(\beta|G)P(G)}{\sum_{g \in GT} P(\beta|g)P(g)}. \quad (3)$$

The most likely genotype is reported at each site, together with a genotype quality calculated as the Phred-scaled (Ewing and Green, 1998) log-likelihood difference between best and second best genotype.

### 2.1.5 Estimating the error model

SnpAD uses a temporary genotype call based on the estimated genotype probabilities to re-estimate the error model. At each site  $\beta$  the posterior probability for genotype  $B_1B_2$  is determined using Eq. (3). For each base  $b$  in a sequences covering a site  $\beta$  the posterior probability for the genotype is used to calculate the probability of observing base  $b$  given that  $B$  was the true base. To avoid overestimating error at true heterozygote sites, bases that match at least one of the two alleles of a genotype are not considered a difference, i.e. the probability of observing the same base as the true base is given by the sum over posterior probabilities of genotypes for which at least one allele matches the observed base. The probability for a base that differs from the true base, on the other hand, sums over all other genotypes weighted by the number of alleles in each genotype that match the true base.

More formally, for true base  $B$  and observed base  $b$  let  $S_1$  denote the set of genotypes where at least one genotype matches base  $b$ . Similarly, let

$S_2$  denote the set of genotypes where only one of the two bases matches  $B$  but none matches  $b$ . The probability of a substitution from  $B$  to  $b$  at site  $\beta$  is

$$P(b|B, \beta) = \begin{cases} \sum_{G \in S_1} P(G|\beta), & \text{if } b = B \\ P(BB|\beta) + \frac{1}{2} \sum_{G \in S_2} P(G|\beta), & \text{if } b \neq B. \end{cases}$$

## 2.2 Simulated Data

Simulated datasets with sequence coverage between 3 and 30-fold were generated to evaluate the performance of snpAD. Each dataset consists of 10 million sites with a fix sequence coverage per site. A site was chosen to be heterozygous with probability  $8 \times 10^{-4}$  ( $2 \times 10^{-4}$  for transitions,  $CT$  and  $GA$ , and  $1 \times 10^{-4}$  for transversions). Genotypes  $CC$ ,  $GG$  had a frequency of 0.1998 and  $AA$ ,  $TT$  of 0.2998.

Bases were randomly drawn with a probability of 0.5 from each of the two alleles of the genotype. Simulations that include reference bias first chose one allele as the reference. Bases were then drawn from this allele with probability  $r = 0.55$ .

Each base was substituted according to pre-defined error probabilities. These probabilities were derived from comparing the untreated Vindija 33.19 Neandertal data to the genotypes of the closely related Altai Neandertal. Separate substitution matrices were calculated for the first 15 and last 15 bases of each sequence and one matrix for the remaining bases in the interior of sequences. Each base was assigned one of the 31 substitution matrices at random and was modified with the probabilities given by this matrix.

## 2.3 Ancient DNA data

I used several published datasets to test the performance of snpAD (Suppl. Table 1). Following previous approaches (Prüfer *et al.*, 2017), the analysis of all datasets were restricted to regions within a 35bp mapability track and sequences with  $MQ < 25$  and bases with  $Q < 30$  were removed. Some datasets consisted of libraries with different treatment that affect error rates. These types of libraries were considered separately for error estimation. Identical to the simulated data, 31 substitution matrices for the first 15 bases, the last 15 bases and central bases were estimated for each type of library.

### 2.3.1 Neandertal data for chromosome 21

I used published sequence data from chromosome 21 of the 30-fold coverage Vindija 33.19 genome (Prüfer *et al.*, 2017). Around 1/4 of this data was enzyme treated to remove ancient DNA damage, while the remaining data were not treated. For error estimation, treated and untreated data were regarded separately. In addition to the full dataset, the chromosome 21 data was subsampled to an average coverage of 3 – 25 using the samtools option "-s" (Li *et al.*, 2009).

Chromosome 21 has also been captured from sequencing libraries of a Neandertal sample from the El Sidrón Cave (Sid1253) and another Neandertal sample from the Vindija Cave (Vindija 33.15) (Kuhlwilm *et al.*, 2016). Note that Vindija 33.19 and 33.15 carry almost identical heterozygous sites on chromosome 21, suggesting that these two samples originate from the same Neandertal individual (Prüfer *et al.*, 2017).

### 2.3.2 Low-coverage Neandertals and modern humans

I used the recently published low-coverage genome sequences (1.0-fold to 2.7-fold coverage) for the late Neandertals Goyet, Spy, Vindija 87, Le Cotte and Mezmaiskaya 2 that are less than 50,000 years old (Hajdinjak *et al.*, 2018). For comparison with these low-coverage Neandertals, the genome-wide data of an untreated Vindija 33.19 library was subsampled to 0.9, 1.0, 1.2, 1.5 and 2.0-fold coverage and processed identically to other low-coverage samples.

In addition, I used 1-fold and 2-fold coverage subsamples from the 22-fold coverage genome of Loschbour, and the full data of Motala 12 (2.4-fold), both around 8000 year old modern human individuals from Europe (Lazaridis *et al.*, 2014).

## 3 Results

### 3.1 Assessing accuracy using simulated data

I first tested snpAD using simulated datasets of 10 million sites, each, ranging from 3 to 30-fold coverage. Parallelizing over 30 processor cores, individual simulations took between 23 and 83 minutes to process and under 6GiB of memory (see Suppl. Fig. 1 & 2).

Since the simulated genotype frequencies and the profile of simulated errors are known, the accuracy of inferred parameters can be estimated with respect to coverage. The simulations showed that a coverage of at least 4-fold is required to estimate genotype frequencies accurately (<10% deviation; Fig. 1). Parameter estimates for the simulation with 3-fold coverage deviated by 30-160% from simulated genotype probabilities (Suppl. Tables 2 & 3).

Lower coverage simulations contain a smaller number of observed bases. To exclude the possibility that a lack of informative sites explains the large deviations for the 3-fold coverage simulation, I repeated the analysis with 100 million sites at 3-fold coverage. As before, estimates deviated substantially from the simulated genotype probabilities (20-130%), indicating that lack of power is not the main reason for the deviation.

Estimates of genotype frequencies were close to simulated parameters when the true error rates were given (<8% difference; Suppl. Table 5), indicating that error rates could not be estimated accurately at 3-fold coverage. Fig 1 shows that the estimated frequencies of errors are, on average, within 10% of the simulated frequencies for datasets with at least 6-fold coverage. Simulations with less than 6-fold coverage show larger deviation from the true parameters, especially for errors that occur at lower frequencies (Fig 1).

### 3.2 Subsamples of a high-coverage Neandertal genome

The Vindija 33.19 Neandertal was previously sequenced to 30-fold genomic coverage. The published genotypes were produced with an earlier version of snpAD, that required error rates to be specified. This error was estimated by comparing the Vindija 33.19 sequences to the closely related Altai Neandertal genome (Prüfer *et al.*, 2014). Genotype calls based on this approach were shown to outperform calls by GATK (Prüfer *et al.*, 2017).

To test the accuracy of parameter estimates, I ran snpAD on the data for chromosome 21 of Vindija 33.19 (89 minutes wall clock runtime on 50 cores and  $\approx 12$ GiB maximum memory usage). Since the true frequencies of error are not known, I used the differences of Vindija 33.19 sequences on chromosome 21 to the previously published Vindija 33.19 genotype calls as a baseline for comparison. The estimated error rates match this baseline well (Suppl. Fig. 3). The genotype frequencies show a difference of less than 1% from previous estimates (Suppl. Table 9).

Simulations indicated that snpAD performs well for high-coverage data, but that parameter estimates fit less well for coverage lower than 6-fold. To test whether these results also hold for a true ancient DNA dataset, I subsampled the chromosome 21 Vindija data to average coverages of 1 to 25-fold. SnpAD estimates on these subsampled data show that genotype and error rates are close (deviate by less than 10% on average) to the estimates with the full data (Fig. 2; Suppl. Table 10) as long as the average coverage is  $\geq 15$ . Datasets with at least 2-fold coverage differed on average by at most 20% from the true genotype frequencies, and at most 30% from true error rates.

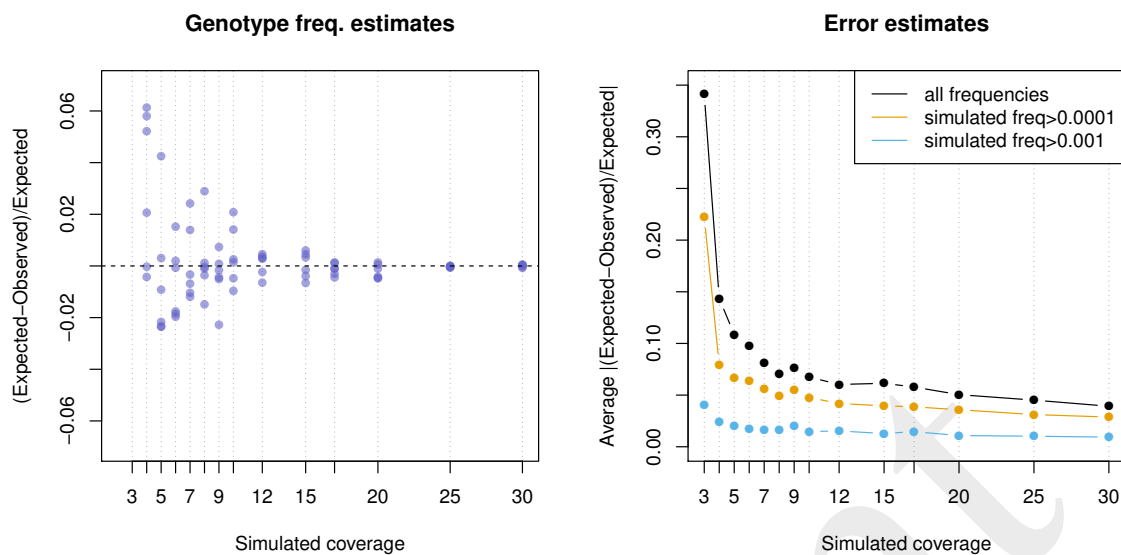

**Fig. 1.** Accuracy of parameter estimation for simulated datasets. Left: Deviation from simulated genotype probabilities for the six heterozygous genotypes. Each simulation is indicated by a vertical blue dotted line and the estimates are shown as blue points. Estimates for 3-fold coverage deviated by more than 0.5 and are not visible at the depicted range. Right: Average deviation from simulated error probabilities.

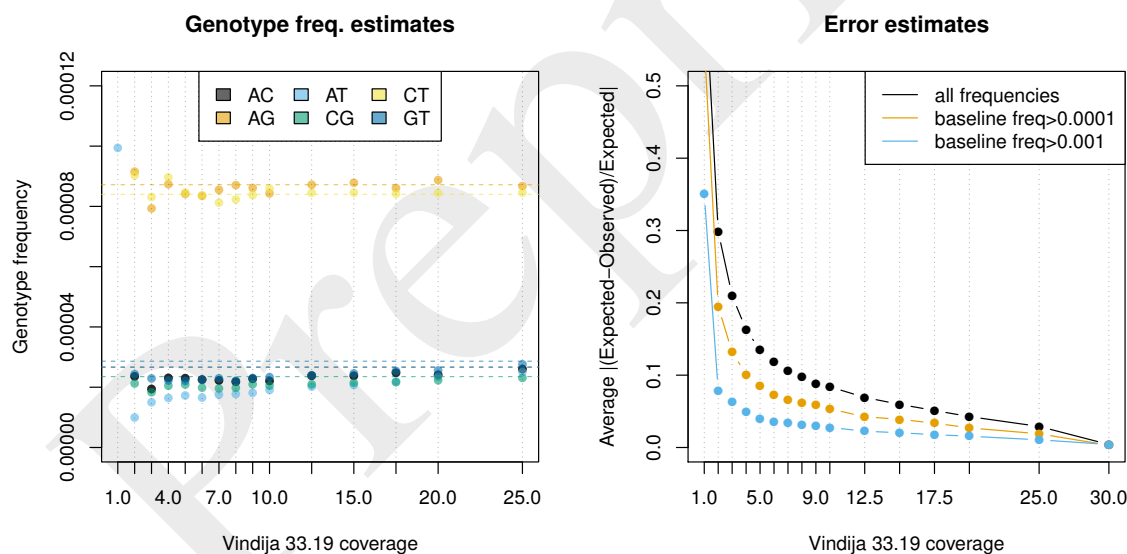

**Fig. 2.** Parameter estimates for subsampled Vindija 33.19 data compared to full data. Left: Estimated genotype frequencies (points) compared to full data (shown as horizontal lines). Right: Average deviation from error rates in the full dataset. Estimates for 1-fold coverage fall outside of the plotted ranges.

The estimated parameters can be used to determine the most likely genotypes along chromosome 21 for each subsampled dataset. To test how coverage affects the accuracy of the most likely call, these genotypes were compared to the genotypes gained from the full 30-fold coverage Vindija data (Suppl. Fig. 4 & 5; Suppl. Table 12). Less than 0.75% of calls at 1-fold coverage or higher were discordant, whereas datasets with at least 12.5-fold coverage showed less than 0.01%. Applying a cutoff on genotype quality scores (GQ30 or GQ50) further reduced the proportion of discordant calls (Suppl. Tables 13 & 14; Suppl. Figs. 6 & 7).

### 3.3 Reference bias

Capture and alignment procedures can introduce a bias in ancient sequence data that leads to an overrepresentation of sequences that support the capture bait or the reference genome used for alignment (reference bias). SnpAD supports the estimation of a parameter that captures this bias by testing for unequal representation of sequences supporting the reference and non-reference alleles at heterozygous sites.

Simulated data with a reference bias of 5% and 0% ( $r = 0.550$  and  $r = 0.500$ ) show that a minimum coverage of 15-fold is required to estimate reference bias (Suppl. Table 7). Simulations with this minimum



coverage yield estimates of  $0.549 - 0.558$  for a simulated  $r = 0.550$  and  $0.500 - 0.508$  for  $r = 0.500$ . That higher coverage is required to estimate reference bias is further corroborated by the subsampled Vindija 33.19 data, which fails to converge for simulations with  $\leq 10$ -fold coverage and yields reference bias estimates from 7.8% to 4.7% for higher coverage datasets (Suppl. Table 11).

Next, I ran snpAD for the chromosome 21 capture data of Vindija 33.15 and El Sidrón. Unfortunately, El Sidrón was too low coverage and parameter estimates did not converge. The higher-coverage Vindija 33.15 data, on the other hand, yielded an estimated 10% reference bias alongside similar genotype frequencies as Vindija 33.19 (Suppl. Table 15). A stronger reference bias for Vindija 33.15 than Vindija 33.19 could be explained by capture bias. This capture bias would favor sequences matching the capture bait, which, in the case of Vindija 33.15, was based on the human reference sequence.

To test whether genotype calling would benefit from incorporating reference bias, I called genotypes for Vindija 33.15 capture data with and without reference bias and compared these calls to those gained from Vindija 33.19 data (Suppl. Table 16). Note that Vindija 33.15 and 33.19 likely originate from the same individual so that genotype calls are expected to match. Vindija 33.15 calls with reference bias show a higher fraction of matching homozygous alternative genotypes (26157/41 match/do not match with bias, compared to 26117/81 without; Fisher's exact test  $p = 0.0004$ ) and matching heterozygous genotypes (3793/116 vs. 3785/124;  $p = 0.6464$ ). However, the calls including reference bias also encompass more than 300 additional heterozygous calls that are not shared with Vindija 33.19. These results suggest that taking reference bias into account for genotype calling leads for Vindija 33.15 data to a larger fraction of false calls while gaining few additional sites that may be called correctly.

### 3.4 Low-coverage genomes

Results based on subsamples of the Vindija 33.19 data on chromosome 21 suggested that the power to estimate genotype frequencies and parameters of the error model are low for low-coverage samples. However, this analysis is limited by the small number of sites on chromosome 21. Furthermore, low-coverage shotgun data is expected to follow approximately a Poisson distribution (Lander and Waterman, 1988), so that even for low-coverage samples some fraction of sites exist that are covered much more often than the average. For a genome at an average 1-fold coverage, for instance, around 2% of sites are expected to be covered by at least 4 sequences (Suppl. Fig 8).

To test whether lower-coverage genomes can yield at least approximate estimates of heterozygosity, I subsampled a single library of Vindija 33.19 to between 0.9 and 2.0-fold coverage. This range of coverage is similar to the range observed in five recently published low-coverage Neandertal genomes ranging from 1.0 to 2.7-fold (Hajdinjak *et al.*, 2018). SnpAD was then run on all sites on the autosomes covered by at least four sequences and the estimates for genotype frequencies were compared to the genome-wide average for the high-coverage Vindija 33.19 Neandertal (Fig. 3). All low-coverage samples yielded overestimates of transition heterozygotes, although the difference to the high-coverage estimates grow smaller with increasing coverage. Transversion heterozygotes were in better agreement with expectation (maximum difference 17%; Suppl. Table 17).

To infer approximate estimates of heterozygosity, I ran snpAD on five low-coverage Neandertals and three low-coverage datasets of modern humans. Estimates of genotype frequencies indicate that all Neandertals are less heterozygous compared to the modern human data (Suppl. Table 18). Estimates for the Neandertals are generally close to estimates from Vindija 33.19, except for estimates for Spy, which are substantially higher (by 36-92%; Fig. 3). Among all tested Neandertals, the Spy

individual is the sample with the lowest coverage and highest modern human contamination (1.7%), offering at least a partial explanation for the higher estimates.

### 3.5 Comparison with ATLAS

ATLAS, a software package for ancient DNA analyses, has been used to estimate heterozygosity from low-coverage genome data (Kousathanas *et al.*, 2017). Like other software (Lindgreen *et al.*, 2014; Zhou *et al.*, 2017), ATLAS uses a model of ancient DNA damage that expects rising rates of C to T exchanges towards the 5'-end and G to A exchanges at the 3' end. Unfortunately, this model does not reflect the patterns of ancient DNA damage in sequencing libraries prepared with a more efficient single-stranded protocol (Gansauge and Meyer, 2013; Meyer *et al.*, 2012) (Suppl. Figs 9 & 10). The latter protocol has been employed for the production of all Neandertal shotgun data used here for the evaluation of snpAD, so that snpAD and ATLAS cannot be compared on these datasets.

To make a comparison possible, I used the data of Motala12, an  $\approx 8000$  year old European hunter-gatherer (Lazaridis *et al.*, 2014) that was sequenced to 2.4-fold coverage and matches ATLAS' expected patterns of ancient DNA damage. ATLAS' error estimates were based on conserved sites and heterozygosity estimates were determined using the *estimateTheta* function (see Suppl. Section 3 for details).

ATLAS estimated a heterozygosity of  $1.24 \times 10^{-3}$  whereas snpAD gave an estimate of  $0.73 \times 10^{-3}$  (Suppl. Tables 19 & 18). While the true heterozygosity of the individual is not known, the heterozygosity of the 22-fold coverage genome of Loschbour, also an  $\approx 8000$  year old hunter-gatherer from Europe, may serve as a proxy to put these numbers in perspective. Heterozygosity of Loschbour was estimated to be  $0.66 \times 10^{-3}$  using GATK (McKenna *et al.*, 2010; Lazaridis *et al.*, 2014) while an earlier version of snpAD yielded  $0.62 \times 10^{-3}$  (Prüfer *et al.*, 2017). I note that snpAD heterozygosity estimates of 1-fold and 2-fold subsamples ( $0.58$  and  $0.59 \times 10^{-3}$ , respectively) of the 22-fold Loschbour sample fall close to these estimates. Present-day non-Africans have been found to fall in the range of  $0.5 - 0.7 \times 10^{-3}$  (Mallick *et al.*, 2016).

## 4 Discussion/Conclusion

Calling genotypes from ancient DNA data is challenging due to the high errors rates in such data. Here, I showed that genotypes can be called by jointly estimating all necessary parameters from the data. Subsampling lower coverage subsets from a high coverage Neandertal genome indicated that the estimated parameters are reasonably accurate ( $<10\%$  deviation) with at least 15-fold coverage. However, lower coverage data can still yield approximate estimates of heterozygosity.

The error model in snpAD differs from those implemented in other software for ancient DNA analyses. This model follows a minimalist approach, in that it only assumes that classes of bases exist that are characterized by the same error rates. The current implementation offers the option to classify observed bases by sequence position and type of library. However, the approach is extendable to incorporate other features that are informative of error rates. The simplistic design allows me to combine sequencing error and ancient DNA damage and to jointly estimate error rates and genotype frequencies. Furthermore, data with other types of error patterns than those observed in ancient DNA could be processed with snpAD without the need for adjustments to the model or subsequent estimation steps.

A perhaps underappreciated issue for ancient DNA analysis is reference bias (e.g. Prüfer *et al.*, 2010). Here I estimate this bias based on the overrepresentation of reference alleles at heterozygous positions. Using capture data from a Neandertal individual that has been shotgun sequenced to high-coverage, I was able to show that incorporating a

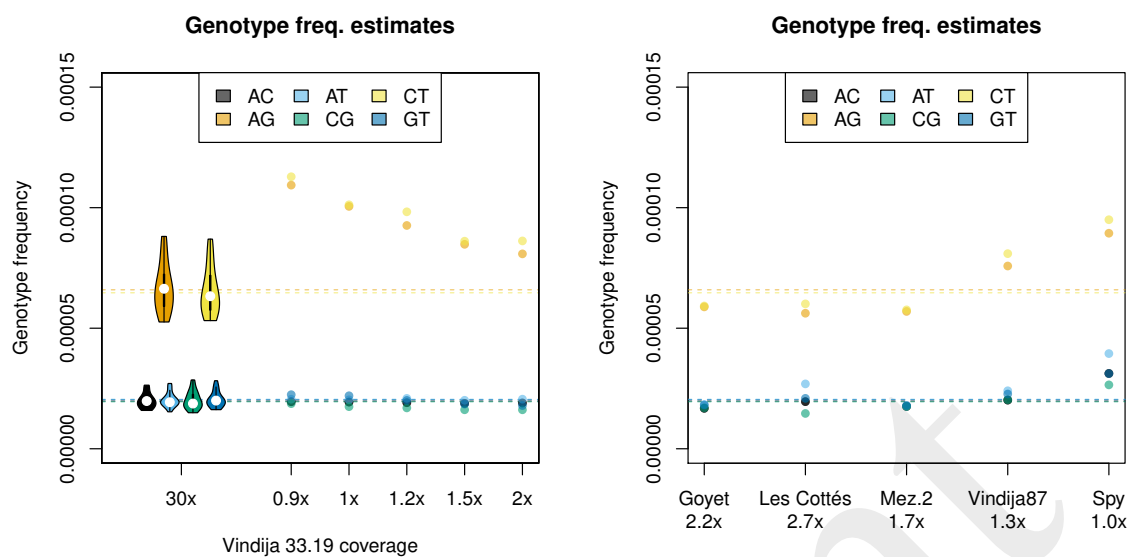

**Fig. 3.** Genotype frequencies for autosomal sites with at least 4-fold coverage. Left: Vindija 33.19 full data and data from a single subsampled library. Violin plots show the distribution over Vindija 33.19 chromosomes. Right: Low-coverage Neandertals. Horizontal lines show genome-wide Vindija 33.19 estimate.

uniform capture bias does not improve genotype calls. A shift of alleles at heterozygous sites also constitute part of the information used by estimators of modern human contamination in archaic individuals (Philip L.F. Johnson's maximum likelihood estimator described in Prüfer *et al.*, 2014; Racimo *et al.*, 2016). The reference bias estimate thus provides an approximate upper limit for modern human contamination. Future work may aim to incorporate contamination estimates into the calling of genotypes to reconstruct sequences in the presence of contamination, similar in spirit to approaches to reconstruct mitochondrial genomes from contaminated sequence data (Renaud *et al.*, 2015).

To gain insight into the effective population sizes of late Neandertals, I used snpAD to estimate heterozygosity for five recently published low-coverage genomes (Hajdinjak *et al.*, 2018). While I caution that these estimates are approximate at best, it is intriguing that several late Neandertals yielded heterozygosity estimates that lie below those estimated from the high-coverage Vindija and Altai Neandertals. These results raise the possibility of particularly low heterozygosity in some of the late Neandertals, that could reflect a small number of individuals towards the end of the Neandertal's reign in Europe.

## Acknowledgements

I would like to thank Nick Patterson for valuable input that motivated further improvements, and the members of the genomics, bioinformatics and ancient DNA groups at the Max Planck Institute for interesting discussions. I am indebted to Cesare de Filippo who helped with earlier tests of ATLAS and snpAD, Michael Dannemann and Fabrizio Mafessoni for critically reading the manuscript, and all members of the Vindija Genome Analysis consortium for patience with and discussions of snpAD genotype calls.

## Funding

This work has been supported by the Max Planck Society.

## References

- Briggs, A. W., Stenzel, U., Johnson, P. L. F., Green, R. E., Kelso, J., Prüfer, K., Meyer, M., Krause, J., Ronan, M. T., Lachmann, M., and Pääbo, S. (2007). Patterns of damage in genomic DNA sequences from a Neandertal. *Proceedings of the National Academy of Sciences of the United States of America*, **104**(37), 14616–21.
- Briggs, A. W., Stenzel, U., Meyer, M., Krause, J., Kircher, M., and Pääbo, S. (2010). Removal of deaminated cytosines and detection of in vivo methylation in ancient DNA. *Nucleic Acids Research*, **38**(6), e87.
- Ewing, B. and Green, P. (1998). Base-calling of automated sequencer traces using phred. II. Error probabilities. *Genome Research*, **8**(3), 186–94.
- Frederico, L. A., Kunkel, T. A., and Shaw, B. R. (1990). A sensitive genetic assay for the detection of cytosine deamination: determination of rate constants and the activation energy. *Biochemistry*, **29**(10), 2532–2537.
- Gansauge, M.-T. and Meyer, M. (2013). Single-stranded DNA library preparation for the sequencing of ancient or damaged DNA. *Nature Protocols*, **8**(4), 737–748.
- Hajdinjak, M., Fu, Q., Hübner, A., Petr, M., Mafessoni, F., Grote, S., Skoglund, P., Narasimham, V., Rougier, H., Crevecoeur, I., Semal, P., Soressi, M., Talamo, S., Hublin, J.-J., Gušić, I., Kučan, Ž., Rudan, P., Golovanova, L. V., Doronichev, V. B., Posth, C., Krause, J., Korlević, P., Nagel, S., Nickel, B., Slatkin, M., Patterson, N., Reich, D., Prüfer, K., Meyer, M., Pääbo, S., and Kelso, J. (2018). Reconstructing the genetic history of late Neanderthals. *Nature*, page in press.
- Johnson, S. G. (2014). The NLOpt nonlinear-optimization package.
- Kousathanas, A., Leuenberger, C., Link, V., Sell, C., Burger, J., and Wegmann, D. (2017). Inferring Heterozygosity from Ancient and Low Coverage Genomes. *Genetics*, **205**(1), 317–332.
- Kuhlwilm, M., Gronau, I., Hubisz, M. J., de Filippo, C., Prado-Martinez, J., Kircher, M., Fu, Q., Burbano, H. A., Lalueza-Fox, C., de la Rasilla, M., Rosas, A., Rudan, P., Brajković, D., Kucan, Ž., Gušić, I., Marques-Bonet, T., Andrés, A. M., Viola, B., Pääbo, S., Meyer, M., Siepel, A., and Castellano, S. (2016). Ancient gene flow from early modern humans into Eastern Neanderthals. *Nature*, **530**(7591), 429–433.
- Lander, E. S. and Waterman, M. S. (1988). Genomic mapping by fingerprinting random clones: a mathematical analysis. *Genomics*, **2**(3), 231–239.
- Lazaridis, I., Patterson, N., Mittnik, A., Renaud, G., Mallick, S., Kirsanow, K., Sudmant, P. H., Schraiber, J. G., Castellano, S., Lipson, M., Berger, B., Economou, C., Bollongino, R., Fu, Q., Bos, K. I., Nordenfelt, S., Li, H., de Filippo, C., Prüfer, K., Sawyer, S., Posth, C., Haak, W., Hallgren, F., Fornander, E., Rohland, N., Delsate, D., Francken, M., Guinet, J.-M., Wahl, J., Ayodo, G., Babiker, H. A., Bailliet, G., Balanovska, E., Balanovsky, O., Barrantes, R., Bedoya, G., Ben-Ami, H., Bene, J., Berrada, F., Bravi, C. M., Brisighelli, F., Busby, G. B. J., Cali, F., Churnosov, M., Cole, D. E. C., Corach, D., Damba, L., van Driem, G., Dryomov, S., Dugoujon, J.-M., Fedorova, S. A., Gallego Romero, I., Gubina, M.,

- Hammer, M., Henn, B. M., Hervig, T., Hodoglugil, U., Jha, A. R., Karachanak-Yankova, S., Khusainova, R., Khusnutdinova, E., Kittles, R., Kivisild, T., Klitz, W., Kučinskas, V., Kushniarevich, A., Laredj, L., Litvinov, S., Loukidis, T., Mahley, R. W., Melegh, B., Metspalu, E., Molina, J., Mountain, J., Näkkäläjärvi, K., Nesheva, D., Nyambo, T., Osipova, L., Parik, J., Platonov, F., Posukh, O., Romano, V., Rothhammer, F., Rudan, I., Ruizbakiev, R., Sahakyan, H., Sajantila, A., Salas, A., Starikovskaya, E. B., Tarekgn, A., Toncheva, D., Turdikulova, S., Uktvetyte, I., Utevska, O., Vasquez, R., Villena, M., Voevoda, M., Winkler, C. A., Yepiskoposyan, L., Zalloua, P., Zemunik, T., Cooper, A., Capelli, C., Thomas, M. G., Ruiz-Linares, A., Tishkoff, S. A., Singh, L., Thangaraj, K., Villems, R., Comas, D., Sukernik, R., Metspalu, M., Meyer, M., Eichler, E. E., Burger, J., Slatkin, M., Pääbo, S., Kelso, J., Reich, D., and Krause, J. (2014). Ancient human genomes suggest three ancestral populations for present-day Europeans. *Nature*, **513**(7518), 409–413.
- Li, H., Handsaker, B., Wysoker, A., Fennell, T., Ruan, J., Homer, N., Marth, G., Abecasis, G., and Durbin, R. (2009). The Sequence Alignment/Map Format and SAMtools. *Bioinformatics*, **25**(16), 2078–2079.
- Lindgreen, S., Krogh, A., and Pedersen, J. S. (2014). SNPest: a probabilistic graphical model for estimating genotypes. *BMC Research Notes*, **7**, 698.
- Link, V., Kousathanas, A., Veeramah, K., Sell, C., Scheu, A., and Wegmann, D. (2017). ATLAS: Analysis Tools for Low-depth and Ancient Samples. *bioRxiv*, page 105346.
- Mallick, S., Li, H., Lipson, M., Mathieson, I., Gymrek, M., Racimo, F., Zhao, M., Chenagiri, N., Nordenfelt, S., Tandon, A., Skoglund, P., Lazaridis, I., Sankararaman, S., Fu, Q., Rohland, N., Renaud, G., Erlich, Y., Willems, T., Gallo, C., Spence, J. P., Song, Y. S., Poletti, G., Balloux, F., van Driem, G., de Knijff, P., Romero, I. G., Jha, A. R., Behar, D. M., Bravi, C. M., Capelli, C., Hervig, T., Moreno-Estrada, A., Posukh, O. L., Balanovska, E., Balanovsky, O., Karachanak-Yankova, S., Sahakyan, H., Toncheva, D., Yepiskoposyan, L., Tyler-Smith, C., Xue, Y., Abdullah, M. S., Ruiz-Linares, A., Beall, C. M., Di Rienzo, A., Jeong, C., Starikovskaya, E. B., Metspalu, E., Parik, J., Villems, R., Henn, B. M., Hodoglugil, U., Mahley, R., Sajantila, A., Stamatoyannopoulos, G., Wee, J. T. S., Khusainova, R., Khusnutdinova, E., Litvinov, S., Ayodo, G., Comas, D., Hammer, M., Kivisild, T., Klitz, W., Winkler, C., Labuda, D., Bamshad, M., Jorde, L. B., Tishkoff, S. A., Watkins, W. S., Metspalu, M., Dryomov, S., Sukernik, R., Singh, L., Thangaraj, K., Pääbo, S., Kelso, J., Patterson, N., and Reich, D. (2016). The Simons Genome Diversity Project: 300 genomes from 142 diverse populations. *Nature*, **538**(7624), 201–206.
- McKenna, A., Hanna, M., Banks, E., Sivachenko, A., Cibulskis, K., Kernysky, A., Garimella, K., Altshuler, D., Gabriel, S., Daly, M., and DePristo, M. A. (2010). The Genome Analysis Toolkit: a MapReduce framework for analyzing next-generation DNA sequencing data. *Genome Research*, **20**(9), 1297–1303.
- Meyer, M., Kircher, M., Gansauge, M.-T., Li, H., Racimo, F., Mallick, S., Schraiber, J. G., Jay, F., Prüfer, K., Filippo, C. d., Sudmant, P. H., Alkan, C., Fu, Q., Do, R., Rohland, N., Tandon, A., Siebauer, M., Green, R. E., Bryc, K., Briggs, A. W., Stenzel, U., Dabney, J., Shendure, J., Kitzman, J., Hammer, M. F., Shunkov, M. V., Derevianko, A. P., Patterson, N., Andrés, A. M., Eichler, E. E., Slatkin, M., Reich, D., Kelso, J., and Pääbo, S. (2012). A High-Coverage Genome Sequence from an Archaic Denisovan Individual. *Science*, **338**(6104), 222–226.
- Nielsen, R., Paul, J. S., Albrechtsen, A., and Song, Y. S. (2011). Genotype and SNP calling from next-generation sequencing data. *Nature Reviews. Genetics*, **12**(6), 443–451.
- Powell, M. (2009). The BOBYQA algorithm for bound constrained optimization without derivatives. *Department of Applied Mathematics and Theoretical Physics, Cambridge England, Technical Report*, (NA2009/06).
- Prüfer, K., Stenzel, U., Hofreiter, M., Pääbo, S., Kelso, J., and Green, R. E. (2010). Computational challenges in the analysis of ancient DNA. *Genome Biology*, **11**(5), R47.
- Prüfer, K., Racimo, F., Patterson, N., Jay, F., Sankararaman, S., Sawyer, S., Heinze, A., Renaud, G., Sudmant, P. H., de Filippo, C., Li, H., Mallick, S., Dannemann, M., Fu, Q., Kircher, M., Kuhlwilm, M., Lachmann, M., Meyer, M., Ongyerth, M., Siebauer, M., Theunert, C., Tandon, A., Moorjani, P., Pickrell, J., Mullikin, J. C., Vohr, S. H., Green, R. E., Hellmann, I., Johnson, P. L. F., Blanche, H., Cann, H., Kitzman, J. O., Shendure, J., Eichler, E. E., Lein, E. S., Bakken, T. E., Golovanova, L. V., Doronichev, V. B., Shunkov, M. V., Derevianko, A. P., Viola, B., Slatkin, M., Reich, D., Kelso, J., and Pääbo, S. (2014). The complete genome sequence of a Neandertal from the Altai Mountains. *Nature*, **505**(7481), 43–49.
- Prüfer, K., de Filippo, C., Grote, S., Mafessoni, F., Korlević, P., Hajdinjak, M., Vernot, B., Skov, L., Hsieh, P., Peyrégne, S., Reher, D., Hopfe, C., Nagel, S., Maricic, T., Fu, Q., Theunert, C., Rogers, R., Skoglund, P., Chintalapati, M., Dannemann, M., Nelson, B. J., Key, F. M., Rudan, P., Kučan, Ž., Gušić, I., Golovanova, L. V., Doronichev, V. B., Patterson, N., Reich, D., Eichler, E. E., Slatkin, M., Schierup, M. H., Andrés, A. M., Kelso, J., Meyer, M., and Pääbo, S. (2017). A high-coverage Neandertal genome from Vindija Cave in Croatia. *Science (New York, N.Y.)*, **358**(6363), 655–658.
- Racimo, F., Renaud, G., and Slatkin, M. (2016). Joint Estimation of Contamination, Error and Demography for Nuclear DNA from Ancient Humans. *PLOS Genetics*, **12**(4), e1005972.
- Renaud, G., Slon, V., Duggan, A. T., and Kelso, J. (2015). Schmutzi: estimation of contamination and endogenous mitochondrial consensus calling for ancient DNA. *Genome Biology*, **16**, 224.
- Sarkissian, C. D., Allentoft, M. E., Ávila-Arcos, M. C., Barnett, R., Campos, P. F., Cappellini, E., Ermini, L., Fernández, R., Fonseca, R. d., Ginolhac, A., Hansen, A. J., Jónsson, H., Korneliusson, T., Margaryan, A., Martin, M. D., Moreno-Mayar, J. V., Raghavan, M., Rasmussen, M., Velasco, M. S., Schroeder, H., Schubert, M., Seguin-Orlando, A., Wales, N., Gilbert, M. T. P., Willerslev, E., and Orlando, L. (2015). Ancient genomics. *Phil. Trans. R. Soc. B*, **370**(1660), 20130387.
- Sawyer, S., Krause, J., Guschanski, K., Savolainen, V., and Pääbo, S. (2012). Temporal patterns of nucleotide misincorporations and DNA fragmentation in ancient DNA. *PLoS One*, **7**(3), e34131.
- Slatkin, M. and Racimo, F. (2016). Ancient DNA and human history. *Proceedings of the National Academy of Sciences*, **113**(23), 6380–6387.
- Zhou, B., Wen, S., Wang, L., Jin, L., Li, H., and Zhang, H. (2017). AntCaller: an accurate variant caller incorporating ancient DNA damage. *Molecular genetics and genomics: MGG*, **292**(6), 1419–1430.
